# Supplementary material for: A G613A missense in the Hutchinson’s progeria lamin A/C gene causes a lone, autosomal dominant atrioventricular block
Source: PubMed Central journal article supplement (PMC4251685; doi:10.1186/s12979-014-0019-3), 2014-11-26
Supplement: 12979_2014_19_MOESM1_ESM.pdf [file 12979_2014_19_MOESM1_ESM.pdf]

## ADDITIONAL FIGURE

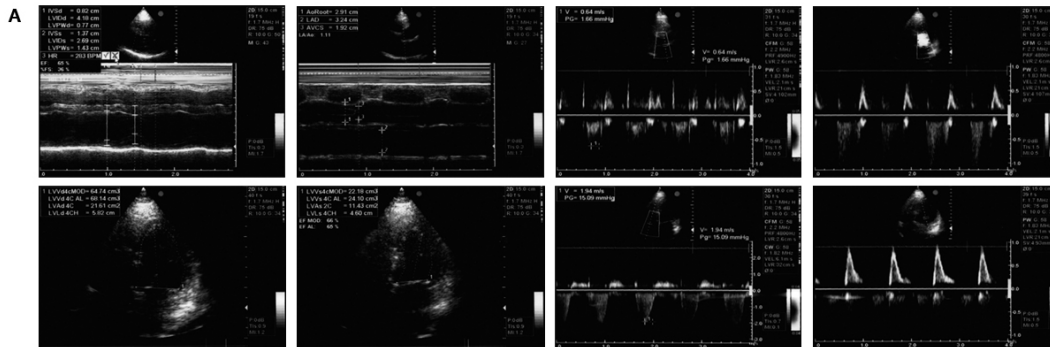

| exam                                              |                  | value                 |
|---------------------------------------------------|------------------|-----------------------|
| Interventricular septal end diastolic dimension   | IVSd             | 0,99 cm               |
| Left Ventricle Internal diastolic Dimension       | LVIDd            | 4,51 cm               |
| Left Ventricle Posterior Wall diastolic Dimension | LVPWd            | 1,04 cm               |
| Interventricular septal end systolic dimension    | IVSs             | 1,43 cm               |
| Left Ventricle Internal systolic Dimension        | LVIDs            | 2,86 cm               |
| Left Ventricle Posterior Wall systolic Dimension  | LVPWs            | 1,59 cm               |
| Heart rate                                        | HR               | 51 bpm                |
| Eject fraction                                    | EV               | 67%                   |
| Fractional shortening                             | FS               | 37%                   |
| Aortic root diameter                              | AoRoot           | 2,91 cm               |
| Left atrial dimension                             | LAD              | 3,40 cm               |
| Left atrial/aortic root dimension ratio           | LA/Ao            | 1,11                  |
| Left Ventricular Volume in Diastole MOD           | LVVd MOD         | 64,73 cm <sup>3</sup> |
| Left Ventricular Volume in Diastole AL            | LVVd AL          | 68,14 cm <sup>3</sup> |
| Left Ventricular Area in Diastole                 | LVA <sub>d</sub> | 21,61 cm <sup>2</sup> |

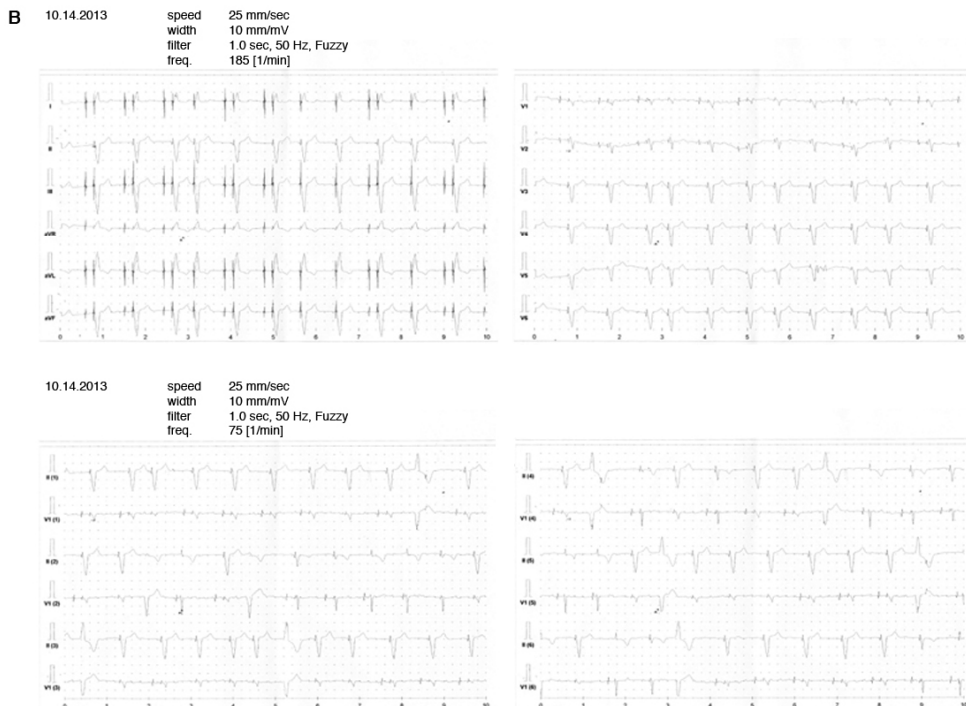

**Additional Figure. Cardiac assessment of the Proband.** Recent echocardiography (A) and electrocardiography (B) of the proband, demonstrating the absence of dilated cardiomyopathy in the subject.
